# Supplementary material for: Centimeter-sized novel two-dimensional organic lead–tin mixed iodide single crystals for efficient photodetector applications
Source: Royal Society of Chemistry journal article supplement (doi:10.1039/d3qi01648j), 2023-11-15
Supplement: d3qi01648j1.pdf [file d3qi01648j1.pdf]

Electronic Supplementary Material (ESI) for Inorganic Chemistry  
Frontiers.

# Centimeter-sized Novel Two-dimensional Organic Lead-Tin Mixed Iodide Single Crystals for Efficient Photodetector Applications

Xiaomei Jiang,<sup>‡,\*a,b</sup> Tiantian Li,<sup>‡,a</sup> Qingzheng Kong,<sup>a</sup> Ying Sun<sup>a</sup> and  
Xutang Tao<sup>\*b</sup>

<sup>a</sup> School of Preventive Medicine Sciences (Institute of Radiation Medicine), Shandong First Medical University & Shandong Academy of Medical Sciences, No. 6699 Qingdao Road, Jinan 250117, People's Republic of China

<sup>b</sup> State Key Laboratory of Crystal Materials, Shandong University, No. 27 Shanda South Road, Jinan 250100, People's Republic of China

<sup>‡</sup>These authors contributed equally.

**\*Corresponding authors.**

E-mail addresses: [jiangxiaomei@sdfmu.edu.cn](mailto:jiangxiaomei@sdfmu.edu.cn), [txt@sdu.edu.cn](mailto:txt@sdu.edu.cn)

**Table S1.** Crystal and Refinement Data for  
(C<sub>8</sub>H<sub>9</sub>F<sub>3</sub>N)<sub>2</sub>Pb<sub>1-x</sub>Sn<sub>x</sub>I<sub>4</sub>(x=0,0.5,1) single crystal

| Empirical Formula                                | (C <sub>8</sub> H <sub>9</sub> F <sub>3</sub> N) <sub>2</sub> PbI <sub>4</sub> | (C <sub>8</sub> H <sub>9</sub> F <sub>3</sub> N) <sub>2</sub> Pb <sub>0.5</sub> Sn <sub>0.5</sub> I <sub>4</sub> | (C <sub>8</sub> H <sub>9</sub> F <sub>3</sub> N) <sub>2</sub> SnI <sub>4</sub> |
|--------------------------------------------------|--------------------------------------------------------------------------------|------------------------------------------------------------------------------------------------------------------|--------------------------------------------------------------------------------|
| <b>Formula Weight/g·mol<sup>-1</sup></b>         | 1067.11                                                                        | 1022.86                                                                                                          | 978.61                                                                         |
| <b>Crystal System</b>                            | monoclinic                                                                     | monoclinic                                                                                                       | monoclinic                                                                     |
| <b>Space Group</b>                               | P2 <sub>1</sub> /c(14)                                                         | P2 <sub>1</sub> /c(14)                                                                                           | P2 <sub>1</sub> /c(14)                                                         |
| <b>Unit Cell Dimensions</b>                      | a=18.3980(8)Å                                                                  | 18.404(4)Å                                                                                                       | 18.3143(10)Å                                                                   |
|                                                  | b=8.5193(3)Å                                                                   | 8.5313(16)Å                                                                                                      | 8.5322(4)Å                                                                     |
|                                                  | c=8.7052(3)Å                                                                   | 8.6674(17)Å                                                                                                      | 8.6166(5)Å                                                                     |
|                                                  | β=97.910(2)°                                                                   | β=97.850(4)°                                                                                                     | β=97.786(2)°                                                                   |
| <b>Volume/Å<sup>3</sup></b>                      | 1351.45(9)                                                                     | 1348.1(5)                                                                                                        | 1334.03                                                                        |
| <b>ρ<sub>calculated</sub>/g·mol<sup>-1</sup></b> | 2.622                                                                          | 2.520                                                                                                            | 2.436                                                                          |
| <b>Z</b>                                         | 2                                                                              | 2                                                                                                                | 2                                                                              |
| <b>Index Ranges</b>                              | -21≤h≤21                                                                       | -21≤h≤21                                                                                                         | -21≤h≤21                                                                       |
|                                                  | -10≤k≤10                                                                       | -9≤k≤10                                                                                                          | -10≤k≤10                                                                       |
|                                                  | -10≤l≤10                                                                       | -8≤l≤10                                                                                                          | -10≤l≤10                                                                       |
| <b>Completeness to θ = 25</b>                    | 100%                                                                           | 98.7%                                                                                                            | 100%                                                                           |
| <b>Data/Restraints/Parameters</b>                | 2382/0/123                                                                     | 2345/142/17<br>1                                                                                                 | 2353/0/123                                                                     |
| <b>Goodness-of-Fit</b>                           | 1.062                                                                          | 1.086                                                                                                            | 1.021                                                                          |
| <b>Final R Indices [I &gt; 2σ(I)]</b>            | R <sub>obs</sub> =0.0314<br>ωR <sub>obs</sub> =0.0654                          | R <sub>obs</sub> =0.0361<br>ωR <sub>obs</sub> =0.1078                                                            | R <sub>obs</sub> =0.0644<br>ωR <sub>obs</sub> =0.0630                          |
| <b>R Indices [all data]</b>                      | R <sub>all</sub> =0.0439<br>ωR <sub>all</sub> =0.0702                          | R <sub>all</sub> =0.0418<br>ωR <sub>all</sub> =0.1131                                                            | R <sub>all</sub> =0.0363<br>ωR <sub>all</sub> =0.0572                          |
| <b>Largest Diff. Peak and Hole</b>               | -0.6 and 0.9 e·Å <sup>-3</sup>                                                 | -0.9 and 1.2 e·Å <sup>-3</sup>                                                                                   | -0.6 and 0.7 e·Å <sup>-3</sup>                                                 |
| <b>2Theta Range (Data Collection)</b>            | 2.235 to 24.995                                                                | 2.234 to 24.995                                                                                                  | 2.240 to 24.000                                                                |
| <b>CCDC Number</b>                               | 2041929<br>[Reported]                                                          | 2234210                                                                                                          | 2211886                                                                        |

**Table S2.** Fractional atomic coordinates and equivalent isotropic Displacement Parameters for  $(C_8H_9F_3N)_2Pb_{1-x}Sn_xI_4$  ( $x=0,0.5,1$ ).

| <b><math>(C_8H_9F_3N)_2PbI_4</math></b>               |            |            |            |                                      |
|-------------------------------------------------------|------------|------------|------------|--------------------------------------|
| <b>Atom</b>                                           | <b>x/a</b> | <b>y/b</b> | <b>z/c</b> | <b>U [<math>\text{\AA}^2</math>]</b> |
| Pb1                                                   | 0.5        | 0.5        | 0.5        | 0.03854(14)                          |
| I1                                                    | 0.32778(3) | 0.43545(7) | 0.43828(7) | 0.05944(19)                          |
| I2                                                    | 0.47029(3) | 0.81034(6) | 0.29930(6) | 0.05504(18)                          |
| C1                                                    | 0.2848(5)  | 0.9509(12) | 0.4259(11) | 0.071(3)                             |
| C2                                                    | 0.2209(3)  | 0.9567(7)  | 0.5133(6)  | 0.057(2)                             |
| C3                                                    | 0.2022(3)  | 0.8229(5)  | 0.5903(7)  | 0.065(2)                             |
| C4                                                    | 0.1456(3)  | 0.8285(5)  | 0.6809(7)  | 0.069(3)                             |
| C5                                                    | 0.1078(3)  | 0.9679(7)  | 0.6945(7)  | 0.062(2)                             |
| C6                                                    | 0.1265(3)  | 1.1018(5)  | 0.6175(7)  | 0.071(3)                             |
| C7                                                    | 0.1831(3)  | 1.0962(6)  | 0.5269(7)  | 0.075(3)                             |
| C8                                                    | 0.0516(7)  | 0.9786(15) | 0.7996(16) | 0.090(3)                             |
| F1                                                    | -0.0145(5) | 0.9906(13) | 0.7237(12) | 0.175(4)                             |
| F2                                                    | 0.0439(5)  | 0.8528(12) | 0.8795(11) | 0.167(4)                             |
| F3                                                    | 0.0574(6)  | 1.0905(13) | 0.8892(13) | 0.221(7)                             |
| N1                                                    | 0.3503(4)  | 1.0236(8)  | 0.5193(9)  | 0.067(2)                             |
| H1A                                                   | 0.3908     | 0.9912     | 0.4836     | 0.081                                |
| H1B                                                   | 0.3521     | 0.9954     | 0.6182     | 0.081                                |
| H1C                                                   | 0.3472     | 1.1277     | 0.5118     | 0.081                                |
| H1D                                                   | 0.2731     | 1.0068     | 0.3286     | 0.085                                |
| H1E                                                   | 0.2954     | 0.8426     | 0.4026     | 0.085                                |
| H3                                                    | 0.2275     | 0.7296     | 0.5812     | 0.078                                |
| H4                                                    | 0.1331     | 0.7389     | 0.7324     | 0.083                                |
| H6                                                    | 0.1012     | 1.1951     | 0.6266     | 0.085                                |
| H7                                                    | 0.1956     | 1.1857     | 0.4754     | 0.09                                 |
| <b><math>(C_8H_9F_3N)_2Pb_{0.5}Sn_{0.5}I_4</math></b> |            |            |            |                                      |
| <b>Atom</b>                                           | <b>x/a</b> | <b>y/b</b> | <b>z/c</b> | <b>U [<math>\text{\AA}^2</math>]</b> |
| Pb1                                                   | 0          | 0.5        | 0          | 0.03453(18)                          |
| Sn1                                                   | 0          | 0.5        | 0          | 0.03453(18)                          |
| I1                                                    | 0.17133(3) | 0.43646(6) | 0.06123(6) | 0.0535(2)                            |
| I2                                                    | 0.02869(3) | 0.80555(5) | 0.20441(5) | 0.0491(2)                            |
| C1                                                    | 0.2149(5)  | 0.5481(12) | 0.5771(11) | 0.066(2)                             |
| C2                                                    | 0.2780(4)  | 0.5416(10) | 0.4892(10) | 0.0516(17)                           |
| C3                                                    | 0.2979(5)  | 0.6772(11) | 0.4117(11) | 0.064(2)                             |
| C3B                                                   | 0.4415(13) | 0.519(4)   | 0.199(2)   | 0.081(5)                             |
| C4                                                    | 0.3563(6)  | 0.6698(11) | 0.3197(11) | 0.068(2)                             |
| C5                                                    | 0.3918(5)  | 0.5317(10) | 0.3011(11) | 0.0593(17)                           |
| C6                                                    | 0.3720(5)  | 0.3990(11) | 0.3823(12) | 0.066(2)                             |
| C7                                                    | 0.3168(5)  | 0.4050(10) | 0.4734(11) | 0.062(2)                             |

|                                                                              |            |            |            |                          |
|------------------------------------------------------------------------------|------------|------------|------------|--------------------------|
| C8                                                                           | 0.4490(7)  | 0.5260(16) | 0.2081(15) | 0.091(2)                 |
| F1                                                                           | 0.5170(5)  | 0.5189(16) | 0.2861(15) | 0.109(3)                 |
| F1B                                                                          | 0.5034(15) | 0.438(4)   | 0.237(4)   | 0.089(7)                 |
| F2                                                                           | 0.4586(6)  | 0.6562(13) | 0.1270(13) | 0.109(3)                 |
| F2B                                                                          | 0.4204(17) | 0.585(4)   | 0.062(3)   | 0.090(6)                 |
| F3                                                                           | 0.4162(14) | 0.463(4)   | 0.055(3)   | 0.085(6)                 |
| F3B                                                                          | 0.4500(7)  | 0.3961(13) | 0.1202(15) | 0.114(3)                 |
| N1                                                                           | 0.1477(4)  | 0.4747(8)  | 0.4858(9)  | 0.0605(18)               |
| H1A                                                                          | 0.15       | 0.4842     | 0.3843     | 0.073                    |
| H1B                                                                          | 0.1077     | 0.5229     | 0.5089     | 0.073                    |
| H1C                                                                          | 0.1458     | 0.3736     | 0.5103     | 0.073                    |
| H1D                                                                          | 0.2045     | 0.6565     | 0.5999     | 0.079                    |
| H1E                                                                          | 0.2269     | 0.4932     | 0.6752     | 0.079                    |
| H3                                                                           | 0.273      | 0.771      | 0.4206     | 0.076                    |
| H4                                                                           | 0.3704     | 0.7601     | 0.2716     | 0.082                    |
| H6                                                                           | 0.3969     | 0.3052     | 0.3739     | 0.079                    |
| H7                                                                           | 0.3051     | 0.3152     | 0.5258     | 0.075                    |
| <b>(C<sub>8</sub>H<sub>9</sub>F<sub>3</sub>N)<sub>2</sub>SnI<sub>4</sub></b> |            |            |            |                          |
| <b>Atom</b>                                                                  | <b>x/a</b> | <b>y/b</b> | <b>z/c</b> | <b>U [Å<sup>2</sup>]</b> |
| Sn1                                                                          | 0.5        | 1          | 0.5        | 0.0373(2)                |
| I1                                                                           | 0.52773(3) | 0.80061(5) | 0.20851(6) | 0.05400(18)              |
| I2                                                                           | 0.32929(3) | 0.93706(6) | 0.43917(6) | 0.05812(19)              |
| C1                                                                           | 0.2865(5)  | 0.4514(10) | 0.4174(10) | 0.069(2)                 |
| C2                                                                           | 0.2219(2)  | 0.4578(6)  | 0.5084(6)  | 0.055(2)                 |
| C3                                                                           | 0.2030(3)  | 0.3238(5)  | 0.5856(6)  | 0.059(2)                 |
| C4                                                                           | 0.1464(3)  | 0.3294(5)  | 0.6780(6)  | 0.067(2)                 |
| C5                                                                           | 0.1089(3)  | 0.4689(7)  | 0.6933(6)  | 0.063(2)                 |
| C6                                                                           | 0.1278(3)  | 0.6029(5)  | 0.6162(7)  | 0.076(3)                 |
| C7                                                                           | 0.1844(3)  | 0.5973(5)  | 0.5237(6)  | 0.071(3)                 |
| C8                                                                           | 0.0523(6)  | 0.4800(14) | 0.7980(15) | 0.091(3)                 |
| F1                                                                           | -0.0130(4) | 0.4953(12) | 0.7251(10) | 0.181(4)                 |
| F2                                                                           | 0.0596(5)  | 0.5883(12) | 0.8938(12) | 0.237(7)                 |
| F3                                                                           | 0.0441(5)  | 0.3549(10) | 0.8773(9)  | 0.164(3)                 |
| N1                                                                           | 0.3529(3)  | 0.5230(7)  | 0.5119(8)  | 0.069(2)                 |
| H1A                                                                          | 0.3933     | 0.4938     | 0.4725     | 0.082                    |
| H1B                                                                          | 0.3558     | 0.4907     | 0.6108     | 0.082                    |
| H1C                                                                          | 0.349      | 0.6269     | 0.5085     | 0.082                    |
| H1D                                                                          | 0.2969     | 0.3433     | 0.3931     | 0.083                    |
| H1E                                                                          | 0.2748     | 0.5079     | 0.3195     | 0.083                    |
| H3                                                                           | 0.2281     | 0.2305     | 0.5753     | 0.071                    |
| H4                                                                           | 0.1337     | 0.2397     | 0.7297     | 0.08                     |
| H6                                                                           | 0.1027     | 0.6962     | 0.6264     | 0.091                    |

|    |        |       |        |       |
|----|--------|-------|--------|-------|
| H7 | 0.1971 | 0.687 | 0.4721 | 0.085 |
|----|--------|-------|--------|-------|

**Table S3.** Bond lengths of  $(C_8H_9F_3N)_2Pb_{1-x}Sn_xI_4$  ( $x=0,0.5,1$ ).

| $(C_8H_9F_3N)_2PbI_4$                                                                   |             | $(C_8H_9F_3N)_2SnI_4$         |             |
|-----------------------------------------------------------------------------------------|-------------|-------------------------------|-------------|
| Atoms                                                                                   | d           | Atoms                         | d           |
| Pb1—I2                                                                                  | 3.1747(5)   | Sn1—I1 <sup>i</sup>           | 3.1315(5)   |
| Pb1—I2 <sup>i</sup>                                                                     | 3.1765(5)   | Sn1—I1 <sup>ii</sup>          | 3.1332(5)   |
| Pb1—I2 <sup>ii</sup>                                                                    | 3.1747(5)   | Sn1—I1                        | 3.1315(5)   |
| Pb1—I2 <sup>iii</sup>                                                                   | 3.1765(5)   | Sn1—I1 <sup>iii</sup>         | 3.1332(5)   |
| Pb1—I1 <sup>ii</sup>                                                                    | 3.1878(6)   | Sn1—I2                        | 3.1454(6)   |
| Pb1—I1                                                                                  | 3.1878(6)   | Sn1—I2 <sup>i</sup>           | 3.1454(6)   |
| I2—Pb1 <sup>iv</sup>                                                                    | 3.1765(5)   | I1—Sn1 <sup>iv</sup>          | 3.1332(5)   |
| N1—C1                                                                                   | 1.4924(114) | N1—C1                         | 1.4989(101) |
| C1—C2                                                                                   | 1.4865(115) | F3—C8                         | 1.2871(149) |
| F3—C8                                                                                   | 1.2271(173) | C2—C7                         | 1.3893(67)  |
| F1—C8                                                                                   | 1.3057(152) | C2—C3                         | 1.3899(70)  |
| F2—C8                                                                                   | 1.2960(167) | C2—C1                         | 1.5063(105) |
| C6—C5                                                                                   | 1.3901(79)  | C7—C6                         | 1.3914(83)  |
| C6—C7                                                                                   | 1.3909(87)  | C6—C5                         | 1.3895(77)  |
| C5—C4                                                                                   | 1.3902(75)  | C5—C4                         | 1.3893(75)  |
| C5—C8                                                                                   | 1.4747(155) | C5—C8                         | 1.4665(139) |
| C4—C3                                                                                   | 1.3909(87)  | C4—C3                         | 1.3908(81)  |
| C3—C2                                                                                   | 1.3894(77)  | F1—C8                         | 1.2800(129) |
| C2—C7                                                                                   | 1.3902(79)  | F2—C8                         | 1.2342(160) |
| $(C_8H_9F_3N)_2Pb_{0.5}Sn_{0.5}I_4$                                                     |             |                               |             |
| Atoms                                                                                   | d           | Atoms                         | d           |
| Pb1 Sn1—I2 <sup>i</sup>                                                                 | 3.1555(6)   | C4—C3                         | 1.425(15)   |
| Pb1 Sn1—I2 <sup>ii</sup>                                                                | 3.1566(6)   | C5—C6                         | 1.406(12)   |
| Pb1 Sn1—I2                                                                              | 3.1556(6)   | C5—C3B                        | 1.359(15)   |
| Pb1 Sn1—I2 <sup>iii</sup>                                                               | 3.1566(6)   | C5—C8                         | 1.411(12)   |
| Pb1 Sn1—I1                                                                              | 3.1719(8)   | C7—C6                         | 1.371(13)   |
| Pb1 Sn1—I3 <sup>i</sup>                                                                 | 3.1720(8)   | Pb01 Sn01—I002 <sup>ii</sup>  | 3.1566(6)   |
| I2—Pb1 Sn1 <sup>iv</sup>                                                                | 3.1566(6)   | Pb01 Sn01—I002 <sup>i</sup>   | 3.1555(6)   |
| I2—Pb1 Sn1 <sup>iv</sup>                                                                | 3.1566(6)   | Pb01 Sn01—I002 <sup>iii</sup> | 3.1566(6)   |
| I2—Pb1 Sn1                                                                              | 3.1556(6)   | Pb01 Sn01—I003 <sup>i</sup>   | 3.1720(8)   |
| I1—Pb1 Sn1                                                                              | 3.1719(8)   | F1B—C3B                       | 1.329(15)   |
| N1—C1                                                                                   | 1.509(11)   | F2B—C3B                       | 1.333(15)   |
| C2—C7                                                                                   | 1.383(12)   | C3B—F4B                       | 1.363(16)   |
| C2—C3                                                                                   | 1.412(13)   | C3A—F4A                       | 1.346(12)   |
| C2—C1                                                                                   | 1.474(12)   | C3A—F2A                       | 1.340(12)   |
| C4—C5                                                                                   | 1.368(14)   | C3A—F1A                       | 1.339(12)   |
| (i) -x, 1-y, -z; (ii) x, 1.5-y, -0.5+z; (iii) -x, -0.5+y, 0.5-z; (iv) -x, 0.5+y, 0.5-z. |             |                               |             |

**Table S4.** Bond angles of  $(\text{C}_8\text{H}_9\text{F}_3\text{N})_2\text{Pb}_{1-x}\text{Sn}_x\text{I}_4$  ( $x=0,0.5,1$ ).

| $(\text{C}_8\text{H}_9\text{F}_3\text{N})_2\text{PbI}_4$                                   |               | $(\text{C}_8\text{H}_9\text{F}_3\text{N})_2\text{SnI}_4$ |               |
|--------------------------------------------------------------------------------------------|---------------|----------------------------------------------------------|---------------|
| Atoms                                                                                      | Angle         | Atoms                                                    | Angle         |
| I2—Pb1—I2 <sup>ii</sup>                                                                    | 180.000       | I1 <sup>i</sup> —Sn1—I1                                  | 180.000       |
| I2 <sup>ii</sup> —Pb1—I2 <sup>i</sup>                                                      | 89.528(13)    | I1—Sn1—I1 <sup>ii</sup>                                  | 90.923(12)    |
| I2—Pb1—I2 <sup>i</sup>                                                                     | 90.472(13)    | I1 <sup>i</sup> —Sn1—I1 <sup>ii</sup>                    | 89.077(12)    |
| I2—Pb1—I2 <sup>iii</sup>                                                                   | 89.528(13)    | I1 <sup>i</sup> —Sn1—I1 <sup>iii</sup>                   | 90.923(12)    |
| I2 <sup>ii</sup> —Pb1—I2 <sup>iii</sup>                                                    | 90.472(13)    | I1—Sn1—I1 <sup>iii</sup>                                 | 89.077(12)    |
| I2 <sup>iii</sup> —Pb1—I2 <sup>i</sup>                                                     | 180.000       | I1 <sup>iii</sup> —Sn1—I1 <sup>ii</sup>                  | 180.000(12)   |
| I2 <sup>iii</sup> —Pb1—I1                                                                  | 86.948(15)    | I1 <sup>ii</sup> —Sn1—I2                                 | 87.937(14)    |
| I2—Pb1—I1                                                                                  | 87.653(15)    | I1—Sn1—I2                                                | 92.242(14)    |
| I2 <sup>i</sup> —Pb1—I1 <sup>ii</sup>                                                      | 86.948(15)    | I1 <sup>i</sup> —Sn1—I2                                  | 87.758(14)    |
| I2 <sup>ii</sup> —Pb1—I1 <sup>ii</sup>                                                     | 87.653(15)    | I1 <sup>iii</sup> —Sn1—I2 <sup>i</sup>                   | 87.937(14)    |
| I2 <sup>ii</sup> —Pb1—I1                                                                   | 92.347(15)    | I1 <sup>iii</sup> —Sn1—I2                                | 92.063(14)    |
| I2 <sup>iii</sup> —Pb1—I1 <sup>ii</sup>                                                    | 93.052(15)    | I1 <sup>ii</sup> —Sn1—I2 <sup>i</sup>                    | 92.063(14)    |
| I2—Pb1—I1 <sup>ii</sup>                                                                    | 92.347(15)    | I1 <sup>i</sup> —Sn1—I2 <sup>i</sup>                     | 92.242(14)    |
| I2 <sup>i</sup> —Pb1—I1                                                                    | 93.052(15)    | I1—Sn1—I2 <sup>i</sup>                                   | 87.758(14)    |
| I1 <sup>ii</sup> —Pb1—I1                                                                   | 180.000       | I2 <sup>i</sup> —Sn1—I2                                  | 180.000       |
| Pb1—I2—Pb1 <sup>iv</sup>                                                                   | 147.035(18)   | Sn1—I1—Sn1 <sup>iv</sup>                                 | 150.849(16)   |
| C2—C1—N1                                                                                   | 110.094(689)  | C7—C2—C3                                                 | 120.062(443)  |
| C5—C6—C7                                                                                   | 119.970(503)  | C7—C2—C1                                                 | 120.909(491)  |
| C6—C5—C8                                                                                   | 119.314(691)  | C3—C2—C1                                                 | 118.908(494)  |
| C4—C5—C6                                                                                   | 120.035(496)  | C6—C7—C2                                                 | 120.000(445)  |
| C4—C5—C8                                                                                   | 120.486(681)  | C7—C6—C5                                                 | 119.922(482)  |
| C3—C4—C5                                                                                   | 119.961(482)  | C6—C5—C8                                                 | 118.921(642)  |
| C4—C3—C2                                                                                   | 120.022(489)  | C4—C5—C6                                                 | 120.079(493)  |
| C3—C2—C1                                                                                   | 119.041(578)  | C4—C5—C8                                                 | 120.889(635)  |
| C7—C2—C1                                                                                   | 120.807(586)  | C3—C4—C5                                                 | 120.007(470)  |
| C7—C2—C3                                                                                   | 120.017(506)  | C4—C3—C2                                                 | 119.932(447)  |
| C2—C7—C6                                                                                   | 119.995(496)  | N1—C1—C2                                                 | 109.821(631)  |
| F3—C8—F1                                                                                   | 104.732(1186) | F3—C8—C5                                                 | 114.586(947)  |
| F3—C8—F2                                                                                   | 107.920(1162) | F1—C8—F3                                                 | 100.175(1009) |
| F3—C8—C5                                                                                   | 115.805(1125) | F1—C8—C5                                                 | 113.327(878)  |
| F1—C8—C5                                                                                   | 112.001(1009) | F2—C8—F3                                                 | 106.003(1055) |
| F2—C8—F1                                                                                   | 99.982(1095)  | F2—C8—C5                                                 | 115.992(1018) |
| F2—C8—C5                                                                                   | 114.809(1047) | F2—C8—F1                                                 | 105.143(1061) |
| (i) 1-x, 2-y, 1-z; (ii) 1-x, 0.5+y, 0.5-z; (iii) x, 1.5-y, 0.5+z; (iv) 1-x, -0.5+y, 0.5-z. |               |                                                          |               |
| $(\text{C}_8\text{H}_9\text{F}_3\text{N})_2\text{Pb}_{0.5}\text{Sn}_{0.5}\text{I}_4$       |               |                                                          |               |
| Atoms                                                                                      | Angle         | Atoms                                                    | Angle         |
| I2 <sup>i</sup> —Pb1 Sn1—I2                                                                | 180.000       | C4—C5—C6                                                 | 118.2(8)      |
| I2—Pb1 Sn1—I2 <sup>iii</sup>                                                               | 90.696(14)    | C4—C5—C8                                                 | 120.2(9)      |

|                                                                                            |             |             |           |
|--------------------------------------------------------------------------------------------|-------------|-------------|-----------|
| $I2^i-Pb1 Sn1-I2^{iii}$                                                                    | 89.304(15)  | C6—C5—C8    | 121.5(9)  |
| $I2^i-Pb1 Sn1-I2^{ii}$                                                                     | 90.696(15)  | C3B—C5—C4   | 121.4(16) |
| $I2-Pb1 Sn1-I2^{ii}$                                                                       | 89.304(14)  | C3B—C5—C6   | 120.3(17) |
| $I2^{ii}-Pb1 Sn1-I2^{iii}$                                                                 | 180.000(19) | C6—C7—C2    | 121.4(8)  |
| $I2^{ii}-Pb1 Sn1-I1^i$                                                                     | 92.696(15)  | C2—C3—C4    | 119.6(9)  |
| $I2^i-Pb1 Sn1-I1^i$                                                                        | 87.761(14)  | C7—C6—C5    | 121.4(8)  |
| $I2^{iii}-Pb1 Sn1-I1$                                                                      | 92.696(15)  | C5—C3B—F3   | 117(2)    |
| $I2-Pb1 Sn1-I1$                                                                            | 87.760(14)  | F2B—C3B—C5  | 114.1(18) |
| $I2-Pb1 Sn1-I1^i$                                                                          | 92.240(14)  | F2B—C3B—F1B | 125.(2)   |
| $I2^{ii}-Pb1 Sn1-I1$                                                                       | 87.304(15)  | F2B—C3B—F3  | 45.(2)    |
| $I2^i-Pb1 Sn1-I1$                                                                          | 92.238(14)  | F1B—C3B—C5  | 120.9(19) |
| $I2^{iii}-Pb1 Sn1-I1^i$                                                                    | 87.304(15)  | F1B—C3B—F3  | 102(3)    |
| $I1-Pb1 Sn1-I1^i$                                                                          | 180.000     | F3B—C8—C5   | 114.9(10) |
| $Pb1 Sn1-I2-Pb1 Sn1^{iv}$                                                                  | 148.884(18) | F1—C8—C5    | 115.5(11) |
| C2—C1—N1                                                                                   | 111.1(7)    | F1—C8—F3B   | 99.4(11)  |
| C7—C2—C3                                                                                   | 118.2(8)    | F2—C8—C5    | 115.7(11) |
| C7—C2—C1                                                                                   | 122.5(8)    | F2—C8—F3B   | 111.9(12) |
| C3—C2—C1                                                                                   | 119.3(9)    | F2—C8—F1    | 96.9(11)  |
| C5—C4—C3                                                                                   | 120.9(9)    |             |           |
| (i) 1-x, 2-y, 1-z; (ii) 1-x, 0.5+y, 0.5-z; (iii) x, 1.5-y, 0.5+z; (iv) 1-x, -0.5+y, 0.5-z. |             |             |           |

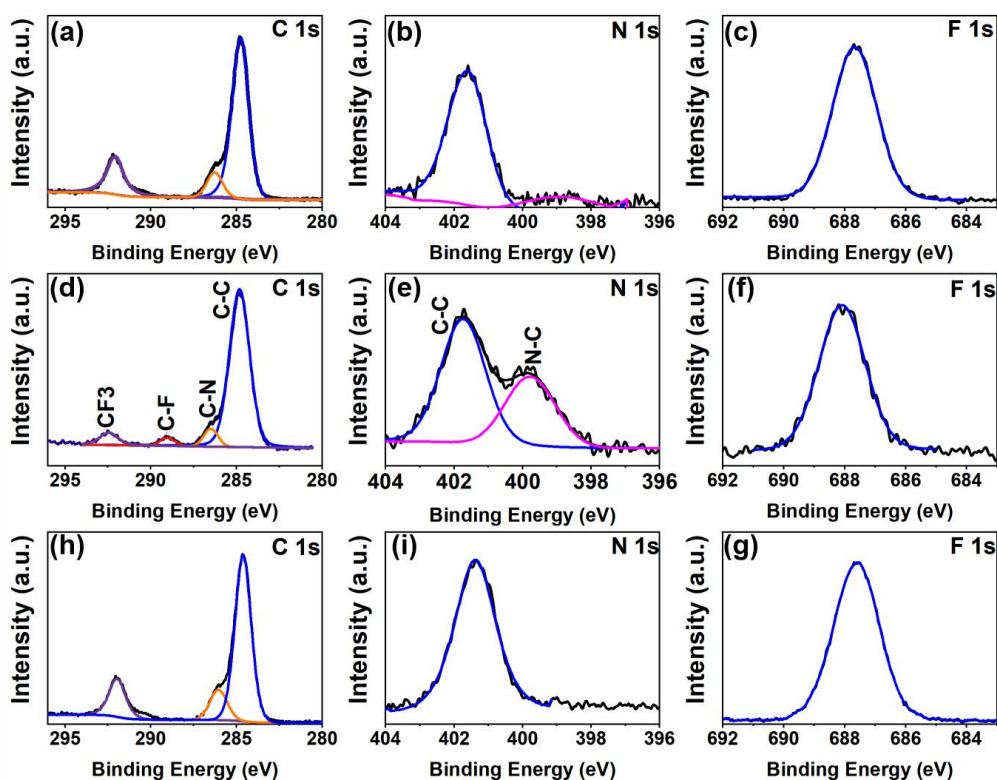

**Fig. S1.** High-resolution XPS spectra of  $(C_8H_9F_3N)_2Pb_{1-x}Sn_xI_4$  ( $x=0,0.5,1$ ) single crystal. (a)-(c)  $(C_8H_9F_3N)_2PbI_4$ , (d-f)  $(C_8H_9F_3N)_2Pb_{0.5}Sn_{0.5}I_4$ , and (h-g)  $(C_8H_9F_3N)_2SnI_4$ .

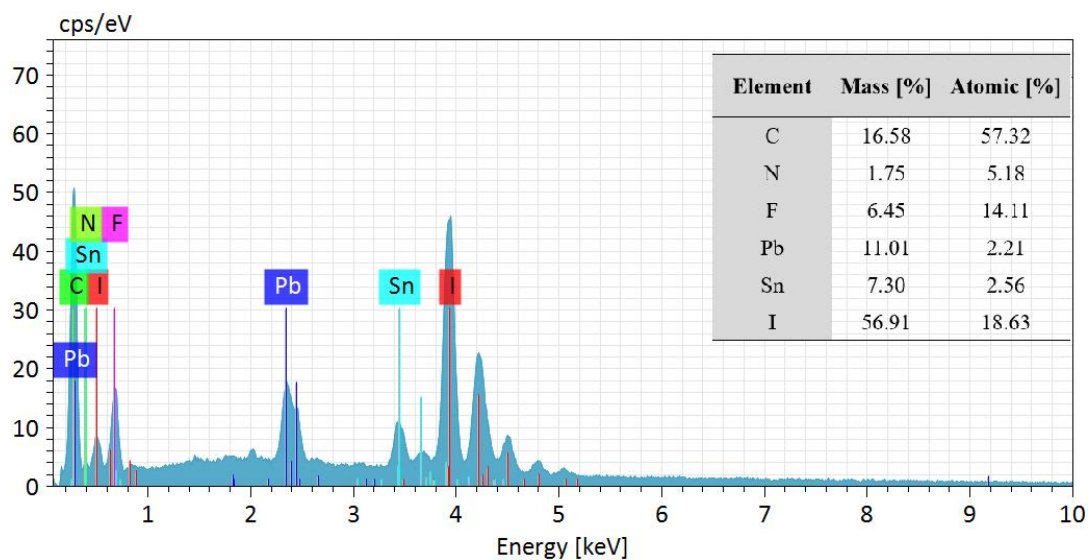

**Fig. S2.** SEM-EDS results of  $(\text{C}_8\text{H}_9\text{F}_3\text{N})_2\text{Pb}_{0.5}\text{Sn}_{0.5}\text{I}_4$  single crystal.

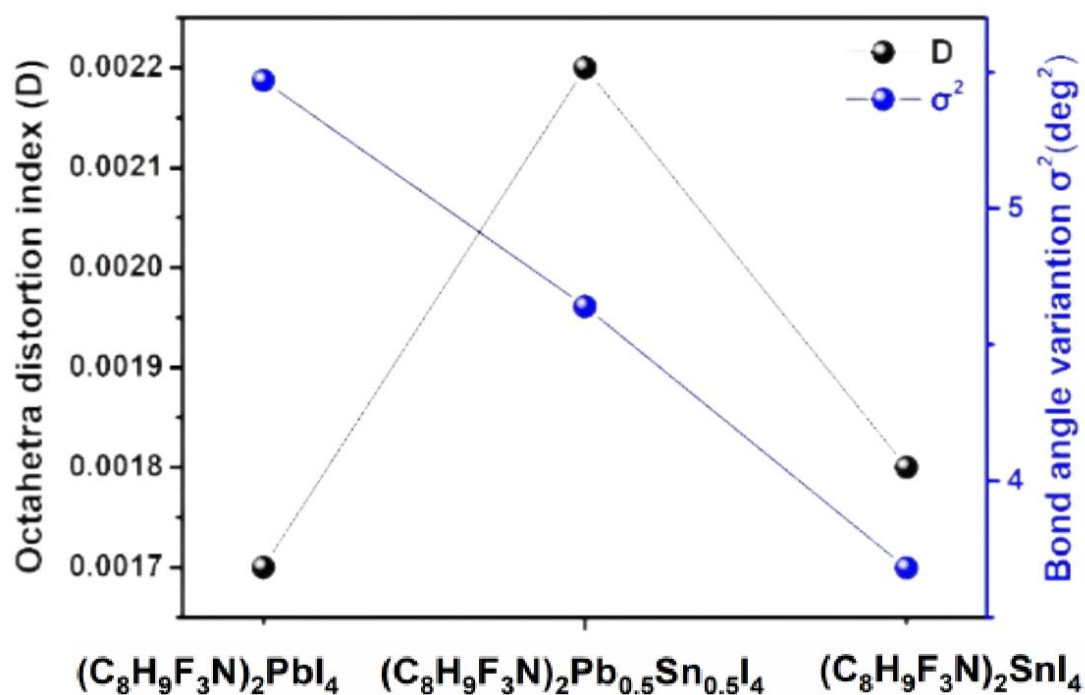

**Fig. S3.** Distortion Index (D), Bond Angle Variance ( $\sigma^2$ ), and bandgap of  $(\text{C}_8\text{H}_9\text{F}_3\text{N})_2\text{Pb}_{1-x}\text{Sn}_x\text{I}_4$  ( $x=0,0.5,1$ ).



**Table S5.** Distortion index (D), bond angle variance ( $\sigma^2$ ), and bandgap of  $(\text{C}_8\text{H}_9\text{F}_3\text{N})_2\text{Pb}_{1-x}\text{Sn}_x\text{I}_4$  ( $x=0,0.5,1$ ).

|                                     | $(\text{C}_8\text{H}_9\text{F}_3\text{N})_2\text{PbI}_4$ | $(\text{C}_8\text{H}_9\text{F}_3\text{N})_2\text{Pb}_{0.5}\text{Sn}_{0.5}\text{I}_4$ | $(\text{C}_8\text{H}_9\text{F}_3\text{N})_2\text{SnI}_4$ |
|-------------------------------------|----------------------------------------------------------|--------------------------------------------------------------------------------------|----------------------------------------------------------|
| <b>Equatorial I-M-I angle (deg)</b> | 89.528                                                   | 90.696                                                                               | 90.923                                                   |
|                                     | 90.472                                                   | 89.304                                                                               | 89.077                                                   |
|                                     | 86.948                                                   | 87.761                                                                               | 87.937                                                   |
| <b>Axial I-M-I angle (deg)</b>      | 87.653                                                   | 87.305                                                                               | 92.242                                                   |
|                                     | 92.347                                                   | 92.239                                                                               | 87.758                                                   |
|                                     | 93.052                                                   | 92.695                                                                               | 92.063                                                   |
| <b>M-I-M angle (deg)</b>            | 147.035                                                  | 150.849                                                                              | 148.884                                                  |
| <b>D</b>                            | 0.0017                                                   | 0.0022                                                                               | 0.0018                                                   |
| <b><math>\sigma^2</math></b>        | 5.47                                                     | 4.64                                                                                 | 3.68                                                     |
| <b>Band gap (eV)</b>                | 2.39                                                     | 1.96                                                                                 | 2.0                                                      |

**Table S6.** Water contact angle of  $(\text{C}_8\text{H}_9\text{F}_3\text{N})_2\text{Pb}_{1-x}\text{Sn}_x\text{I}_4$  ( $x=0,0.5,1$ ).

| <b>Perovskite</b>                                                                                | <b>Water contact angle (deg)</b> |
|--------------------------------------------------------------------------------------------------|----------------------------------|
| $\text{Cs}_2\text{AgBiBr}_6/\text{SnO}_2/\text{ZnO}$ [1]                                         | 15                               |
| $\text{Cs}_2\text{AgBiBr}_6/\text{ZnO}$ [1]                                                      | 48                               |
| 3D MAPbI <sub>3</sub> [2]                                                                        | 38.88                            |
| FAPbI <sub>3</sub> [3]                                                                           | 46.9                             |
| (iBA) <sub>2</sub> PbI <sub>4</sub> [4]                                                          | 46.2                             |
| iBA(DMPDA) <sub>0.5</sub> PbI <sub>4</sub> [4]                                                   | 50.7                             |
| $\text{Cs}_2\text{AgBiBr}_6$ [5]                                                                 | 50.2                             |
| (FAPbI <sub>3</sub> ) <sub>0.95</sub> (MAPbBr <sub>3</sub> ) <sub>0.05</sub> [6]                 | 54.6                             |
| $(\text{C}_8\text{H}_9\text{F}_3\text{N})_2\text{PbI}_4$ (This work)                             | 58.25                            |
| $(\text{C}_8\text{H}_9\text{F}_3\text{N})_2\text{Pb}_{0.5}\text{Sn}_{0.5}\text{I}_4$ (This work) | 60.25                            |
| $(\text{C}_8\text{H}_9\text{F}_3\text{N})_2\text{SnI}_4$ (This work)                             | 50.00                            |

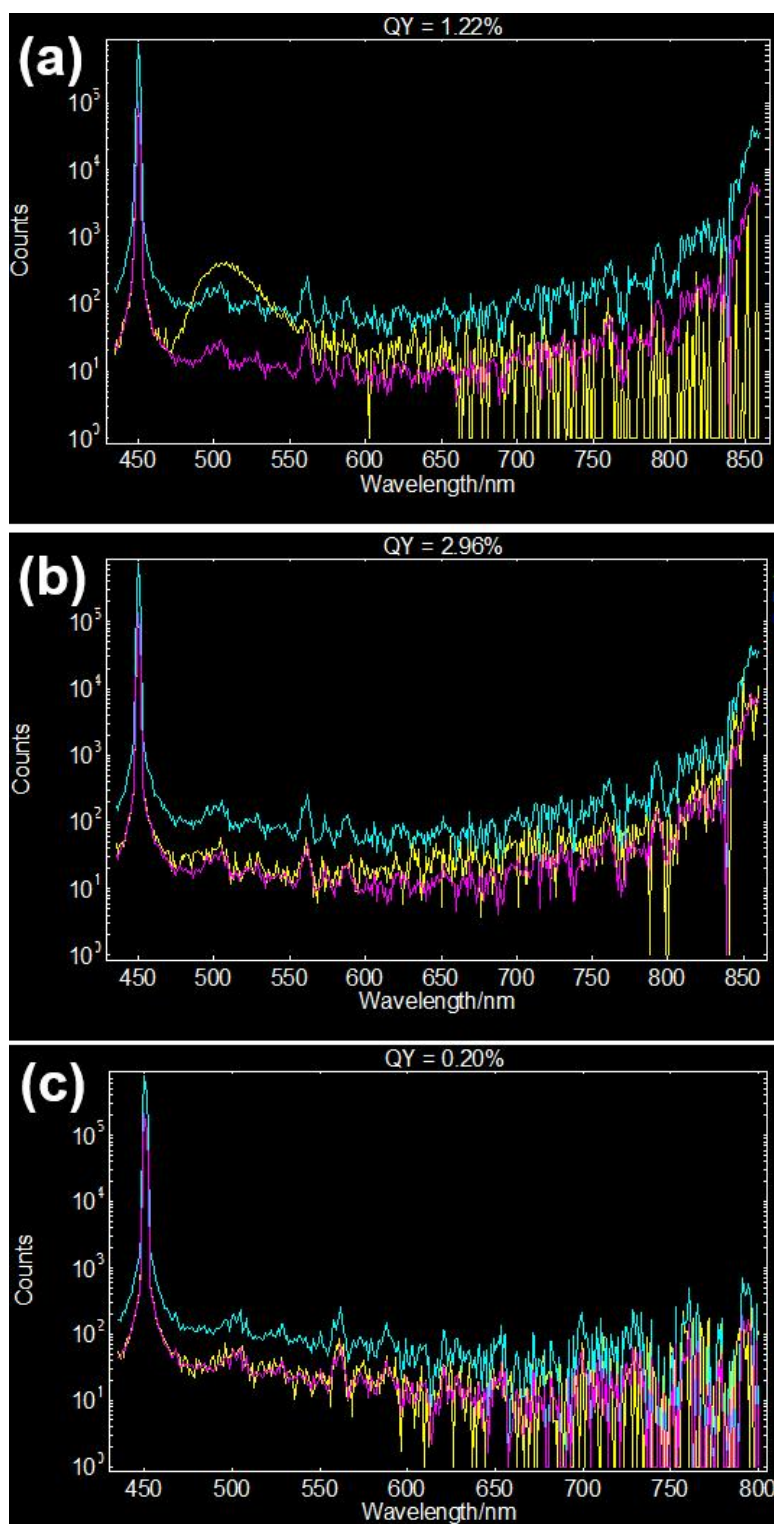

**Fig. S4.** PLQY results of  $(\text{C}_8\text{H}_9\text{F}_3\text{N})_2\text{Pb}_{1-x}\text{Sn}_x\text{I}_4$  ( $x=0,0.5,1$ ). (a)  $(\text{C}_8\text{H}_9\text{F}_3\text{N})_2\text{PbI}_4$ , (b)  $(\text{C}_8\text{H}_9\text{F}_3\text{N})_2\text{Pb}_{0.5}\text{Sn}_{0.5}\text{I}_4$ , and (c)  $(\text{C}_8\text{H}_9\text{F}_3\text{N})_2\text{SnI}_4$ .

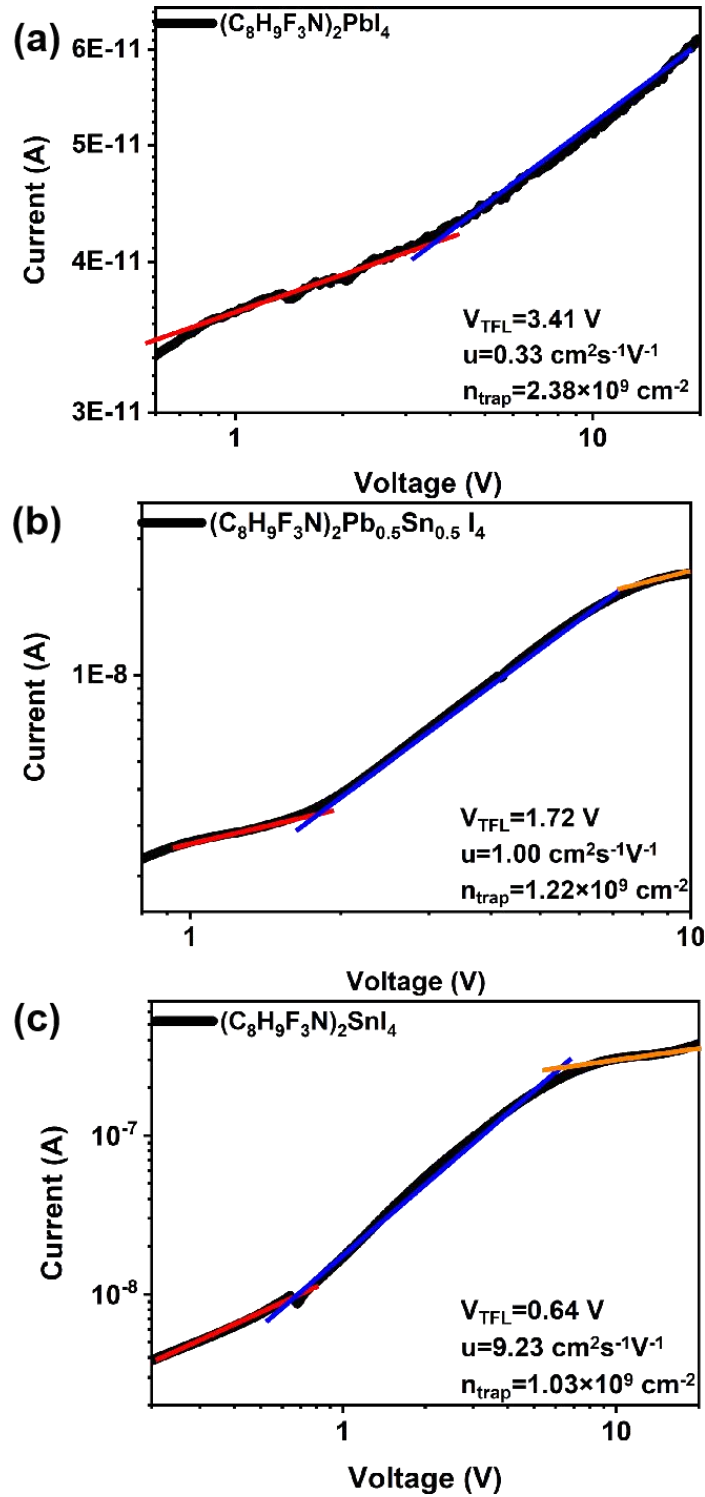

**Fig. S5.** Current-voltage curves and trap density at 298 K. Characteristic  $I$ - $V$  curves with two different regimes for (a)  $(\text{C}_8\text{H}_9\text{F}_3\text{N})_2\text{PbI}_4$  and three different regimes for (b)  $(\text{C}_8\text{H}_9\text{F}_3\text{N})_2\text{Pb}_{0.5}\text{Sn}_{0.5}\text{I}_4$  and (c)  $(\text{C}_8\text{H}_9\text{F}_3\text{N})_2\text{SnI}_4$ . A linear Ohmic regime ( $I \propto V$ , red line) is followed by the trap-filled regime (TFL), marked by a steep increase in current ( $I \propto V^n$  ( $n > 3$ )). The orange line denotes the trap-free Child's regime ( $I \propto V^2$ ).

**Table S7.** The performances of Sn-containing perovskite-based photodetectors.

| Materials                                                                                                                    | Light intensity<br>( $\mu\text{W cm}^{-2}$ ) | On/off<br>current<br>ratio | R<br>( $\text{A W}^{-1}$ ) | D*<br>(Jones)         |
|------------------------------------------------------------------------------------------------------------------------------|----------------------------------------------|----------------------------|----------------------------|-----------------------|
| PEA <sub>2</sub> SnI <sub>4</sub> film (30% SnF <sub>2</sub> )[7]                                                            | 2000                                         | /                          | 207.5                      | $2.53 \times 10^{13}$ |
| FASnI <sub>3</sub> Film[8]                                                                                                   | 0.064                                        | /                          | $10^5$                     | $1.9 \times 10^{12}$  |
| TBASnCl <sub>3</sub> QDs[9]                                                                                                  | 360                                          | 67                         | 0.0148                     | $5.04 \times 10^{10}$ |
| TBASnCl <sub>3</sub> (0.03 M SnF <sub>2</sub> ) QDs[9]                                                                       | 360                                          | 238                        | 0.0097                     | $7.67 \times 10^{10}$ |
| MAPb <sub>0.5</sub> Sn <sub>0.5</sub> I <sub>3</sub> thin films[10]                                                          | 614.3                                        | /                          | 0.0016                     | $3.08 \times 10^{10}$ |
| (PEA) <sub>2</sub> SnI <sub>4</sub> /MoS <sub>2</sub> [11]                                                                   | 36 pw                                        | $10^2$                     | 0.121                      | $8.09 \times 10^9$    |
| (rGO/PEDOT:PSS)/(PEA) <sub>2</sub> SnI <sub>4</sub> [12]                                                                     | 56.9                                         | /                          | 16                         | $1.92 \times 10^{11}$ |
| TiO <sub>2</sub> /CsSnI <sub>3</sub> /P3HT[13]                                                                               | /                                            | /                          | 0.257                      | $1.5 \times 10^{11}$  |
| CsSnI <sub>3</sub> [14]                                                                                                      | /                                            | 1.08                       | 0.054                      | $3.85 \times 10^5$    |
| CH <sub>3</sub> NH <sub>3</sub> Pb <sub>0.7</sub> Sn <sub>0.3</sub> I <sub>3</sub> [15]                                      | /                                            | /                          | 0.39                       | $7 \times 10^{12}$    |
| (PEA) <sub>2</sub> SnI <sub>4</sub> microsheets[16]                                                                          | 195.8                                        | 10                         | $3.29 \times 10^3$         | $2.06 \times 10^{11}$ |
| (C <sub>8</sub> H <sub>9</sub> F <sub>3</sub> N) <sub>2</sub> PbI <sub>4</sub> (This work)                                   | 7000                                         | $10^3$                     | 0.0138                     | $8.7 \times 10^{10}$  |
| (C <sub>8</sub> H <sub>9</sub> F <sub>3</sub> N) <sub>2</sub> Pb <sub>0.5</sub> Sn <sub>0.5</sub> I <sub>4</sub> (This work) | 7000                                         | 48                         | 0.6681                     | $8.6 \times 10^{10}$  |
| (C <sub>8</sub> H <sub>9</sub> F <sub>3</sub> N) <sub>2</sub> SnI <sub>4</sub> (This work)                                   | 7000                                         | 18                         | 0.0323                     | $4.7 \times 10^9$     |

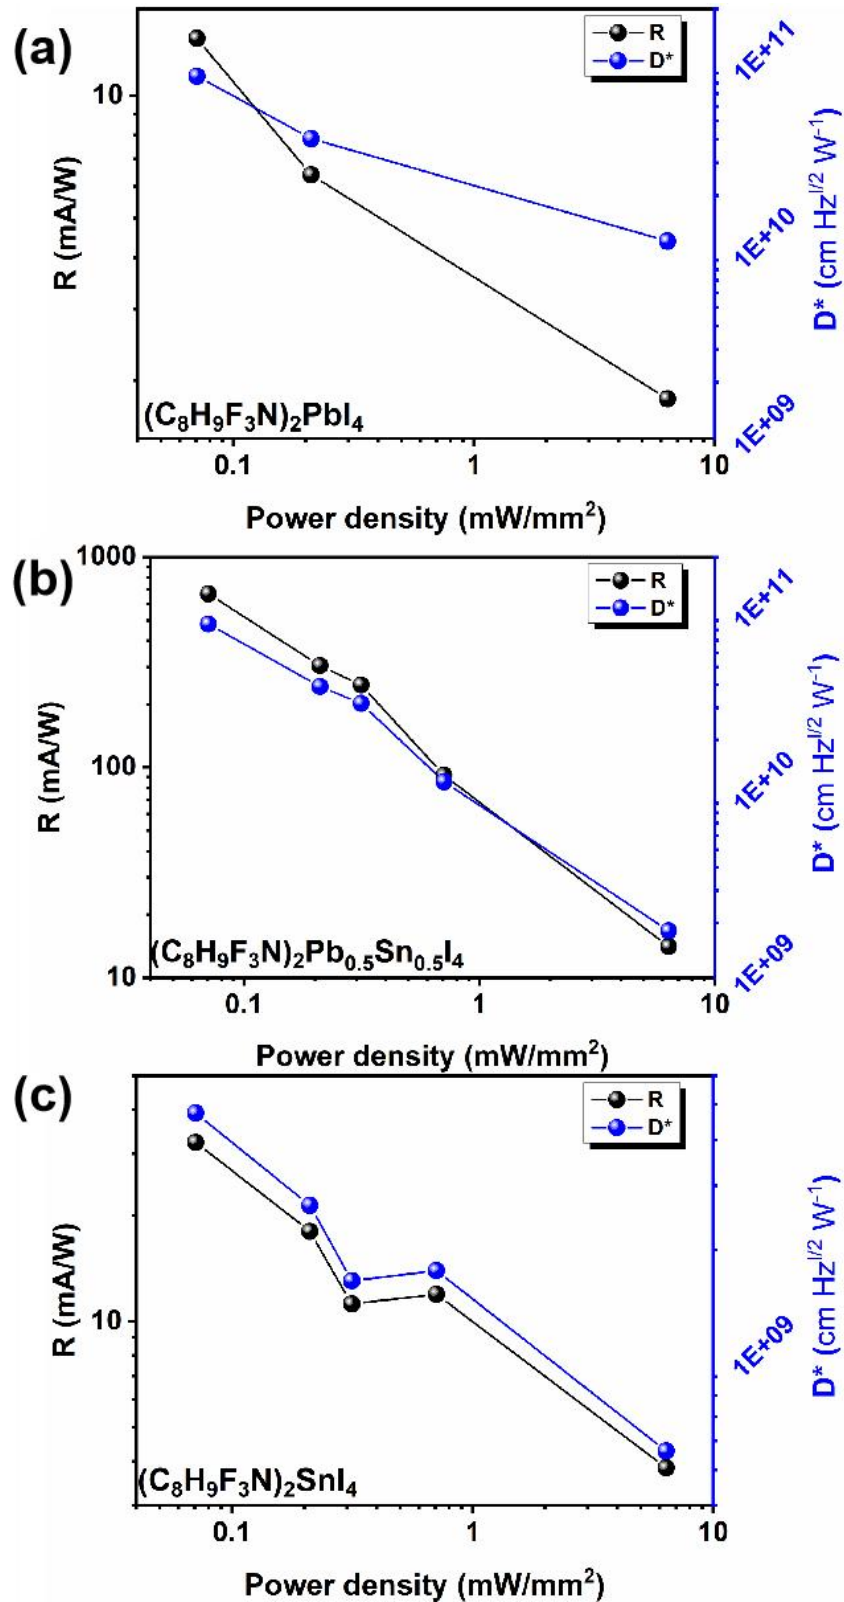

**Fig. S6.** Relationship of responsivity ( $R$ ) and detectivity ( $D^*$ ) with light power density at 10 V. (a)  $(\text{C}_8\text{H}_9\text{F}_3\text{N})_2\text{PbI}_4$ , (b)  $(\text{C}_8\text{H}_9\text{F}_3\text{N})_2\text{Pb}_{0.5}\text{Sn}_{0.5}\text{I}_4$ , and (c)  $(\text{C}_8\text{H}_9\text{F}_3\text{N})_2\text{SnI}_4$ .

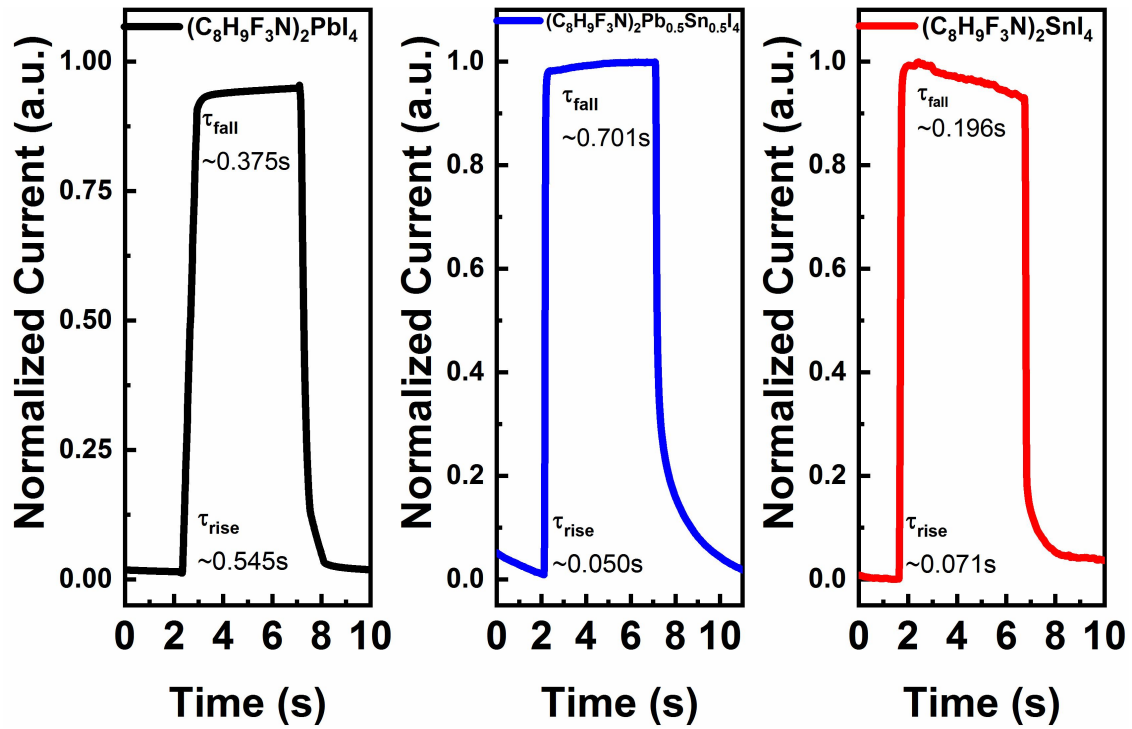

**Fig. S7.** Temporal response of  $(\text{C}_8\text{H}_9\text{F}_3\text{N})_2\text{Pb}_{1-x}\text{Sn}_x\text{I}_4$  ( $x=0,0.5,1$ ) single crystal-based photodetectors at the light intensity of  $20\text{ mWcm}^{-2}$  under a bias of 5V. (a)  $(\text{C}_8\text{H}_9\text{F}_3\text{N})_2\text{PbI}_4$ , (b)  $(\text{C}_8\text{H}_9\text{F}_3\text{N})_2\text{Pb}_{0.5}\text{Sn}_{0.5}\text{I}_4$ , and (c)  $(\text{C}_8\text{H}_9\text{F}_3\text{N})_2\text{SnI}_4$ .

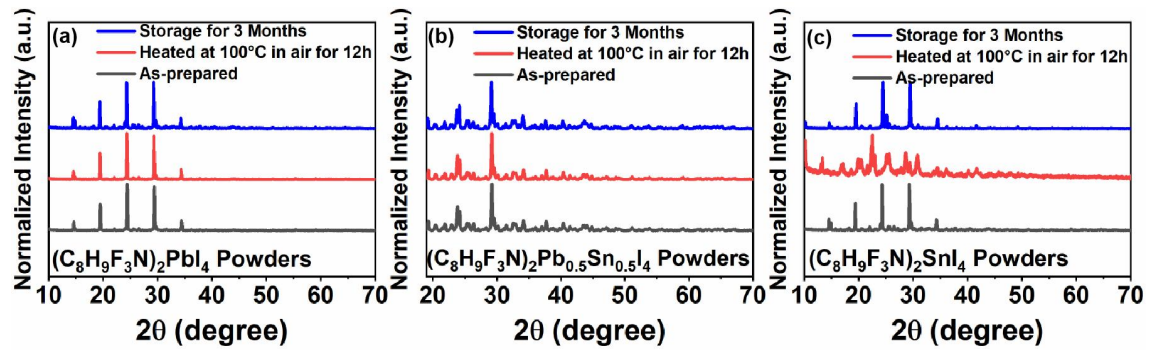

**Fig. S8.** Stability test. (a)-(c) PXR patterns of  $(\text{C}_8\text{H}_9\text{F}_3\text{N})_2\text{Pb}_{1-x}\text{Sn}_x\text{I}_4$  ( $x=0,0.5,1$ ) powders that stored in ambient environment ( $T=24\text{-}30^\circ\text{C}$ ,  $\text{RH}=45\text{-}65\%$ ) for above 3 months.

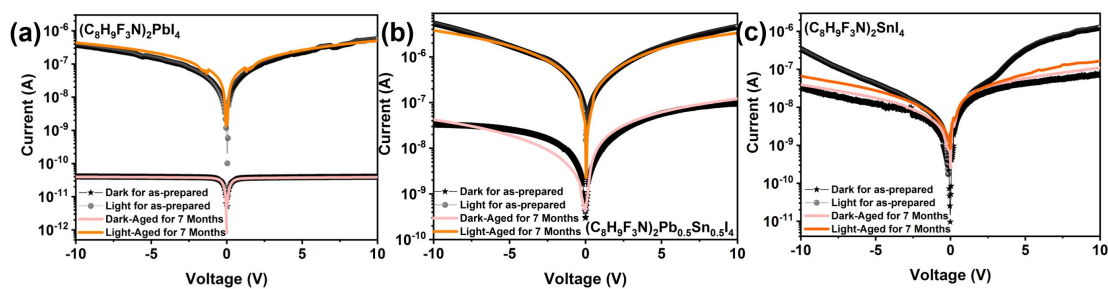

**Fig. S9. Stability test.** I-V curves for (a)  $(\text{C}_8\text{H}_9\text{F}_3\text{N})_2\text{PbI}_4$ , (b)  $(\text{C}_8\text{H}_9\text{F}_3\text{N})_2\text{Pb}_{0.5}\text{Sn}_{0.5}\text{I}_4$ , and (c)  $(\text{C}_8\text{H}_9\text{F}_3\text{N})_2\text{SnI}_4$  with the device architecture of Au/BCP/ $\text{C}_{60}$ / $(\text{C}_8\text{H}_9\text{F}_3\text{N})_2\text{Pb}_{1-x}\text{Sn}_x\text{I}_4$  ( $x=0,0.5,1$ ) single crystal/ $\text{C}_{60}$ /BCP/Au under the illumination of 405 nm laser ( $P=6.37$   $\text{mW}/\text{mm}^2$ ).

## References

- [1] W. Shen, U. Jung, Z. Xian, B. Jung and J. Park, Enhanced device performance of  $\text{Cs}_2\text{AgBiBr}_6$  double perovskite photodetector by  $\text{SnO}_2/\text{ZnO}$  double electron transport layer, *J. Alloys Compd.*, 2022, **929**, 167329.
- [2] N. Guo, Z. Zhou, J. Ni, H.-K. Cai, J.-J. Zhang, Y.-Y. Sun and J. Li, Thin film transistor based on two-dimensional organic-inorganic hybrid perovskite, *Acta Phys. Sin.*, 2020, **69**198102.
- [3] R. Yu, G. Wu, R. Shi, Z. Ma, Q. Dang, Y. Qing, C. Zhang, K. Xu and Z. a. Tan, Multidentate coordination induced crystal growth regulation and trap passivation enables over 24% efficiency in perovskite solar cells, *Adv. Energy Mater.*, 2022, **13**, 2203127.
- [4] Z. Lai, F. Wang, Y. Meng, X. Bu, X. Kang, Q. Quan, W. Wang, C. Liu, S. Yip and J. C. Ho, Superior performance and stability of 2D dion-jacobson halide perovskite photodetectors operated under harsh conditions without encapsulation, *Adv. Opt. Mater.*, 2021, **9**, 2101523.
- [5] R. Li, H. Jiang, Y. Yao, H. Ye, X. Liu, S. Chen and J. Luo, Bulk single crystals of a narrow band gap three-dimensional hybrid perovskitoid enabling ultrastable photodetection, *Chem. Mater.*, 2022, **34**, 10382-10389.
- [6] X. Wu, L. Zhang, Z. Xu, S. Olthof, X. Ren, Y. Liu, D. Yang, F. Gao and S. Liu, Efficient perovskite solar cells via surface passivation by a multifunctional small organic ionic compound, *J. Mater. Chem. A*, 2020, **8**, 8313-8322.
- [7] K. R. Yun, T. J. Lee, S. K. Kim, J. H. Kim and T. Y. Seong, Fast and highly sensitive photodetectors based on Pb-free Sn-based perovskite with additive engineering, *Adv. Opt. Mater.*, 2022, **11**, 2201974.
- [8] C. K. Liu, Q. Tai, N. Wang, G. Tang, H. L. Loi and F. Yan, Sn-based perovskite for highly sensitive photodetectors, *Adv. Sci.*, 2019, **6**, 1900751.

- [9] Z. Zhang, S. Yang, J. Hu, H. Peng, H. Li, P. Tang, Y. Jiang, L. Tang and B. Zou, One-pot synthesis of novel ligand-free tin(II)-based hybrid metal halide perovskite quantum dots with high anti-water stability for solution-processed UVC photodetectors, *Nanoscale*, 2022, **14**, 4170-4180.
- [10] J. Wu, Y. Zhang, S. Yang, Z. Chen and W. Zhu, Thin MAPb<sub>0.5</sub>Sn<sub>0.5</sub>I<sub>3</sub> Perovskite single crystals for sensitive infrared light detection, *Front. Chem.*, 2021, **9**, 821699.
- [11] C. Fang, H. Wang, Z. Shen, H. Shen, S. Wang, J. Ma, J. Wang, H. Luo and D. Li, High-performance photodetectors based on lead-free 2D ruddlesden-popper perovskite/MoS<sub>2</sub> heterostructures, *ACS Appl. Mater. Interfaces*, 2019, **11**, 8419-8427.
- [12] L. Qian, Y. Sun, M. Wu, C. Li, D. Xie, L. Ding and G. Shi, A lead-free two-dimensional perovskite for a high-performance flexible photoconductor and a light-stimulated synaptic device, *Nanoscale*, 2018, **10**, 6837-6843.
- [13] F. Cao, W. Tian, M. Wang, M. Wang and L. Li, Stability enhancement of lead-free CsSnI<sub>3</sub> perovskite photodetector with reductive ascorbic acid additive, *InfoMat*, 2020, **2**, 577-584.
- [14] M. Han, J. Sun, M. Peng, N. Han, Z. Chen, D. Liu, Y. Guo, S. Zhao, C. Shan, T. Xu, X. Hao, W. Hu and Z.-x. Yang, Controllable Growth of Lead-Free All-inorganic perovskite nanowire array with fast and stable near-infrared photodetection, *J. Phys. Chem. C*, 2019, **123**, 17566-17573.
- [15] Y. Wang, D. Yang, D. Ma, D. H. Kim, T. Ahamad, S. M. Alshehri and A. Vadim, Organic-inorganic hybrid Sn-based perovskite photodetectors with high external quantum efficiencies and wide spectral responses from 300 to 1000 nm, *Science China Materials*, 2018, **62**, 790-796.
- [16] L. Qian, Y. Sun, M. Sun, Z. Fang, L. Li, D. Xie, C. Li and L. Ding, 2D perovskite microsheets for high-performance photodetectors, *J. Mater. Chem C*, 2019, **7**, 5353-5358.
